# Supplementary material for: Impacts of future agricultural change on ecosystem service indicators
Source: Copernicus journal article supplement (doi:10.5194/esd-2019-44), 2019-08-15
Supplement: Supplementary file 1 [file LPJGP_1way_impacts_v5.3.1_supp_methods.pdf › LPJGP_1way_impacts_v5.3.1_supp_methods.pdf]

# Impacts of future agricultural change on ecosystem service indicators

## Supplementary Methods

### SM1 Run setup

The first run performed in this study generated the calibration factors described in Sect. SM2. In the calibration run for Alexander et al. (2018), only four crop stand types were simulated in LPJ-GUESS, corresponding to the four LPJ-GUESS CFTs (Alexander et al., 2018). This meant that starchy roots, oilcrops, and pulses all received the same management inputs (i.e., fertilizer and irrigation). In the work presented here, we have separated these three into distinct stand types that all use the TeSW CFT but with different management inputs based on crop-specific historical datasets (Table SM7). This change results in different calibration factors being used here than in Alexander et al. (2018); the new calibration factors can be found in Fig. SM2.

A set of “yield-generating” experiments were then performed to produce potential crop yields and pasture grass production for input to PLUM. These consist of two phases: an initial and an alternating phase. The initial phase runs from 1850 to 2000, and is intended to reproduce historical land uses and crop yields in a way that is consistent with previously developed land-use histories.

The alternating phase, which begins in 2001, iterates between “potential runs” and “actual runs,” the latter of which exist only to provide initial soil conditions to the potential runs (Fig. SM1). In the potential runs, the non-barren land in every gridcell is converted to 50% cropland and 50% pasture, with homogenized soil based on the state after the previous actual run (Fig. SM1). Cropland is subdivided into 36 equally-sized stands in a factorial experiment with the six crop stand types (excluding *Miscanthus*), three nitrogen fertilizer treatments (0, 200, and 1000 kgN ha<sup>-1</sup> yr<sup>-1</sup>, and two irrigation treatments (rainfed or fully irrigated). Potential runs begin every five years, with each lasting ten years. Only the last five years’ yields are passed to PLUM, with the first five years being used to give LPJ-GUESS time to spin up crop phenological parameters. Thus, for example, the potential run covering 2006–2015 generates output for 2011–2015, which is used in PLUM to determine land uses and managements for 2016–2020 (Fig. SM1). Actual runs each last five years, with

the land system state being saved after each for input to the potential runs.

### SM2 Mapping of MIRCA, LPJ-GUESS, and PLUM crop types

MIRCA crop types are mapped to the LPJ-GUESS crop stand types as described in Table SM7. Some MIRCA categories were excluded: sugarcane, citrus, date palm, grapes/vine, cotton, cocoa, coffee, other annuals, other perennials, and fodder grasses. A dummy crop type, ExtraCrop, was created to partition this unmapped fraction of cropland away from cropland considered in PLUM. Additionally, 10.3% of mapped crop types were moved to ExtraCrop, corresponding to the cropland fraction not harvested due, e.g., to crop failures or fallow periods (FAOSTAT, 2018c, b). In all, approximately 38% of cropland was in ExtraCrop over 2001–2010. LPJ-GUESS plants ExtraCrop, which receives no irrigation or fertilizer, with either winter wheat (TeWW) or spring wheat (TeSW) based on sowing constraints derived from long-term climate history in each gridcell. By not applying management inputs to ExtraCrop, we likely underestimate the effects of future land use and management changes on water use and nitrogen losses in absolute terms; however, this allows us to focus solely on the ecosystem services impacts of the crops explicitly included in PLUM.

To generate yields of a crop not included in LPJ-GUESS (e.g., oilcrops), a separate stand is simulated and planted with spring wheat, and a calibration factor then later multiplied onto the resulting yields to generate a wider range of crop yields as input to PLUM (Table SM7). (For consistency, calibration factors are also used for crops such as rice that are included in both LPJ-GUESS and PLUM.) These calibration factors are derived from a comparison of the LPJ-GUESS simulated yields with the crop yields reported in the FAOSTAT database (FAOSTAT, 2018c, a). A historical “calibration run” from 1901–2005 was used to generate gridded yields for 1995–2005; these were aggregated to the country level, with simulated country-year data points being regressed (with Y-intercept set to zero) against the values derived from FAOSTAT.

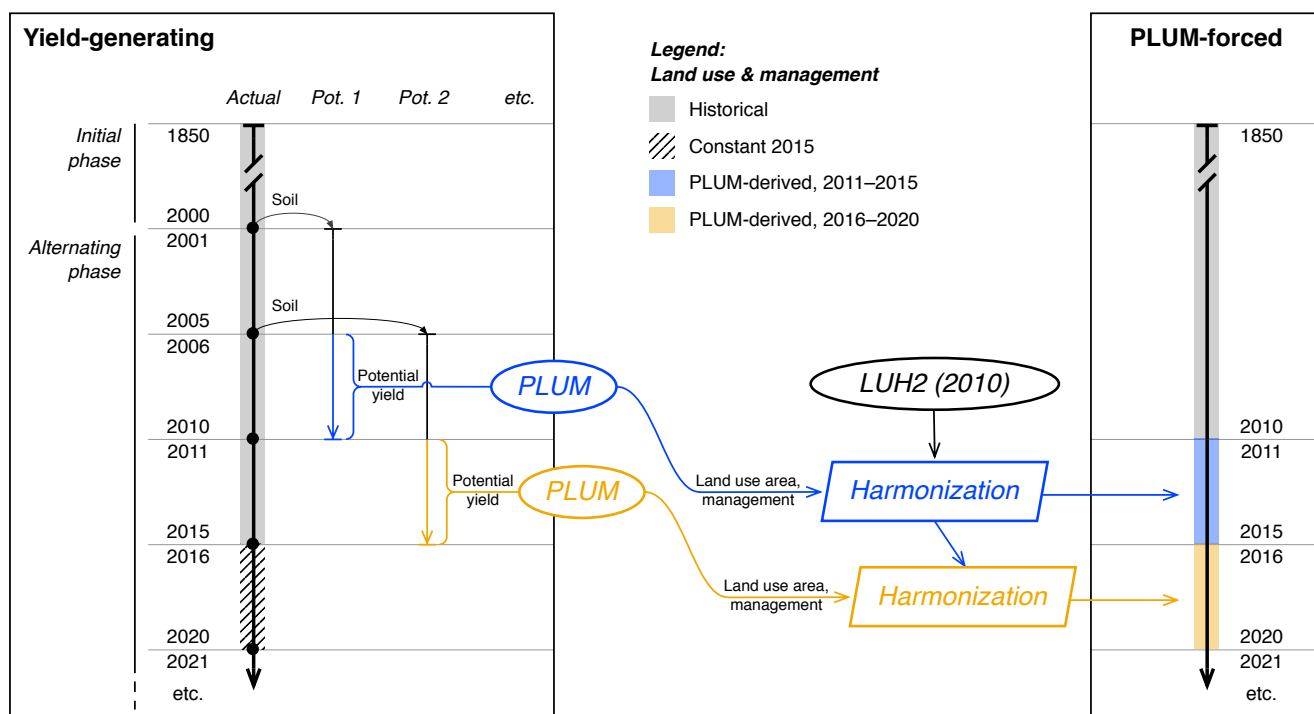

**Figure SM1.** Information flow between LPJ-GUESS and PLUM. Historical land use and management is time-varying for land use fractions through 2015 but constant for crop mix, fertilizer application, and per-crop irrigated fraction (see Sect. 3.3.1). Adapted from Figure SI-1 in Alexander et al. (2018).

**Table SM1.** Guide to the runs performed.

| Run name                    | Years     | Purpose                                                                                                                                       | Number                                                                                                                                        |
|-----------------------------|-----------|-----------------------------------------------------------------------------------------------------------------------------------------------|-----------------------------------------------------------------------------------------------------------------------------------------------|
| Calibration                 | 1901–2005 | Simulate 1995–2005 crop yields for calibrating against FAOSTAT data.                                                                          | 1                                                                                                                                             |
| Yield-generating, actual    | 1850–2100 | 1850–2010: Historical simulation for comparison with PLUM-forced future runs.<br>All: Provide soil state for yield-generating potential runs. | 1850–2010: 1<br>2011–2100: 4 (RCP-SSP combinations)                                                                                           |
| Yield-generating, potential | 1850–2100 | Generate potential yield for each crop type under different fertilization and irrigation treatments, for use in PLUM.                         | 1850–2010: 1<br>2011–2100: 4 (RCP-SSP combinations)                                                                                           |
| PLUM-forced                 | 2011–2100 | Simulate terrestrial vegetation and ecosystem service indicators under land-use and -management trajectories specified by PLUM.               | 17: (standard, constant-CO <sub>2</sub> + climate)*(4 PLUM outputs) + constant-LU*(3 RCPs) + onlyCO <sub>2</sub> *3 RCPs + onlyClimate*3 RCPs |

**Table SM2.** Input data used for each portion of calibration run. Zhang et al. (2017) manure data extended as specified in Methods.

| Years     | Climate          | LU   | Crop fractions | Fert.                               | Irrig.       |
|-----------|------------------|------|----------------|-------------------------------------|--------------|
| 1850–1900 | –                | –    | –              | –                                   | –            |
| 1901–2005 | CRU-NCEP v7 CRUp | LUH2 | MIRCA @2000    | AgMIP@ 2000 +<br>Zhang et al. @2000 | MIRCA @2000* |
| 2006–2010 | –                | –    | –              | –                                   | –            |
| 2011–2015 | –                | –    | –              | –                                   | –            |
| 2016–2100 | –                | –    | –              | –                                   | –            |

–: Time period not simulated in given run.

DATASET @YYYY: Using value from DATASET at year YYYY.

\*: Irrigation specified by fraction of crop fully rainfed or fully irrigated.

**Table SM3.** Input data used for each portion of “actual” yield-generating runs. Zhang et al. (2017) manure data extended as specified in Methods.

| Years     | Climate               | LU            | Crop fractions | Fert.                              | Irrig. |
|-----------|-----------------------|---------------|----------------|------------------------------------|--------|
| 1850–1900 | CMIP5<br>IPSL-CM5A-MR | LUH2          | MIRCA @2000    | LUH2 + Zhang et al.                | LUH2*  |
| 1901–2005 | ↓                     | ↓             | ↓              | ↓                                  | ↓      |
| 2006–2010 | ↓                     | ↓             | ↓              | ↓                                  | ↓      |
| 2011–2015 | ↓                     | ↓             | ↓              | ↓                                  | ↓      |
| 2016–2100 | ↓                     | LUH2<br>@2015 | ↓              | LUH2 @2015 + Zhang<br>et al. @2015 | ↓      |

DATASET @YYYY: Using value from DATASET at year YYYY.

\*: Irrigation specified by fraction of crop fully rainfed or fully irrigated.

**Table SM4.** Input data used for each portion of “potential” yield-generating runs.

| Years     | Climate                   | LU                                                              | Crop fractions                                             | Fert.                                   | Irrig.                        |
|-----------|---------------------------|-----------------------------------------------------------------|------------------------------------------------------------|-----------------------------------------|-------------------------------|
| 1850–1900 | –                         | –                                                               | –                                                          | –                                       | –                             |
| 1901–2005 | –                         | –                                                               | –                                                          | –                                       | –                             |
| 2006–2010 | CMIP5<br>IPSL-<br>CM5A-MR | Ice/water from LUH2;<br>vegetated 50-50<br>cropland and pasture | Even crop × fertilizer ×<br>irrigation factorial<br>stands | 0, 200, or 1000<br>kgN ha <sup>-1</sup> | Rainfed or<br>fully irrigated |
| 2011–2015 | ↓                         | ↓                                                               | ↓                                                          | ↓                                       | ↓                             |
| 2016–2100 | ↓                         | ↓                                                               | ↓                                                          | ↓                                       | ↓                             |

–: Time period not simulated in given run.

**Table SM5.** Input data used for each portion of PLUM-forced runs. Zhang et al. (2017) manure data extended as specified in Methods.

| Years     | Climate               | LU   | Crop fractions | Fert.               | Irrig.       |
|-----------|-----------------------|------|----------------|---------------------|--------------|
| 1850–1900 | CMIP5<br>IPSL-CM5A-MR | LUH2 | MIRCA @2000    | LUH2 + Zhang et al. | MIRCA @2000* |
| 1901–2005 | ↓                     | ↓    | ↓              | ↓                   | ↓            |
| 2006–2010 | ↓                     | ↓    | ↓              | ↓                   | ↓            |
| 2011–2015 | ↓                     | PLUM | PLUM           | PLUM                | PLUM†        |
| 2016–2100 | ↓                     | PLUM | PLUM           | PLUM                | PLUM†        |

DATASET @YYYY: Using value from DATASET at year YYYY.

\*: Irrigation specified by fraction of crop fully rainfed or fully irrigated.

†: irrigation specified as fraction of maximum irrigation demand fulfilled.

**Table SM6.** Parameters used in PLUM. For more information, see Alexander et al. (2018) main text and supplement.

| Parameter                                                                                 | SSP1     | SSP3     | SSP4     | SSP5     |
|-------------------------------------------------------------------------------------------|----------|----------|----------|----------|
| Irrigation cost, $w_{cost}$ (USD m <sup>-2</sup> )                                        | 0.000440 | 0.000232 | 0.000350 | 0.000232 |
| Fertilizer cost, $f_{cost}$ (USD t <sup>-1</sup> )                                        | 2.2      | 1.5      | 1.8      | 1.1      |
| Other intensity cost, $m_{cost}$ (USD at max management input)                            | 0.8      | 0.7      | 0.7      | 0.6      |
| Land cover change cost, $l_{change}$ :<br>Natural to agricultural (USD ha <sup>-1</sup> ) | 107      | 31       | 54       | 38       |
| Land cover change cost, $l_{change}$ :<br>Pasture to cropland (USD ha <sup>-1</sup> )     | 290      | 205      | 232      | 161      |
| Land cover change cost, $l_{change}$ :<br>Cropland to pasture (USD ha <sup>-1</sup> )     | 575      | 366      | 432      | 300      |
| Minimum natural or managed forest cover                                                   | 19.5%    | 4.5%     | 6.2%     | 4.5%     |
| Technology yield change rate, $\delta$ , above that from intensification of production    | 0.44%    | 0.00%    | 0.20%    | 0.30%    |
| International market price sensitivity, $\lambda$                                         | 0.4      | 0.4      | 0.4      | 0.4      |
| International import tariff, $i_{tariff}$                                                 | −20%     | 43%      | 19%      | −36%     |
| Transport costs, $t_{cost}$ (USD t <sup>-1</sup> )                                        | 63       | 43       | 57       | 37       |
| Annual change in imports allowed                                                          | 2.2%     | 1.4%     | 1.7%     | 2.6%     |

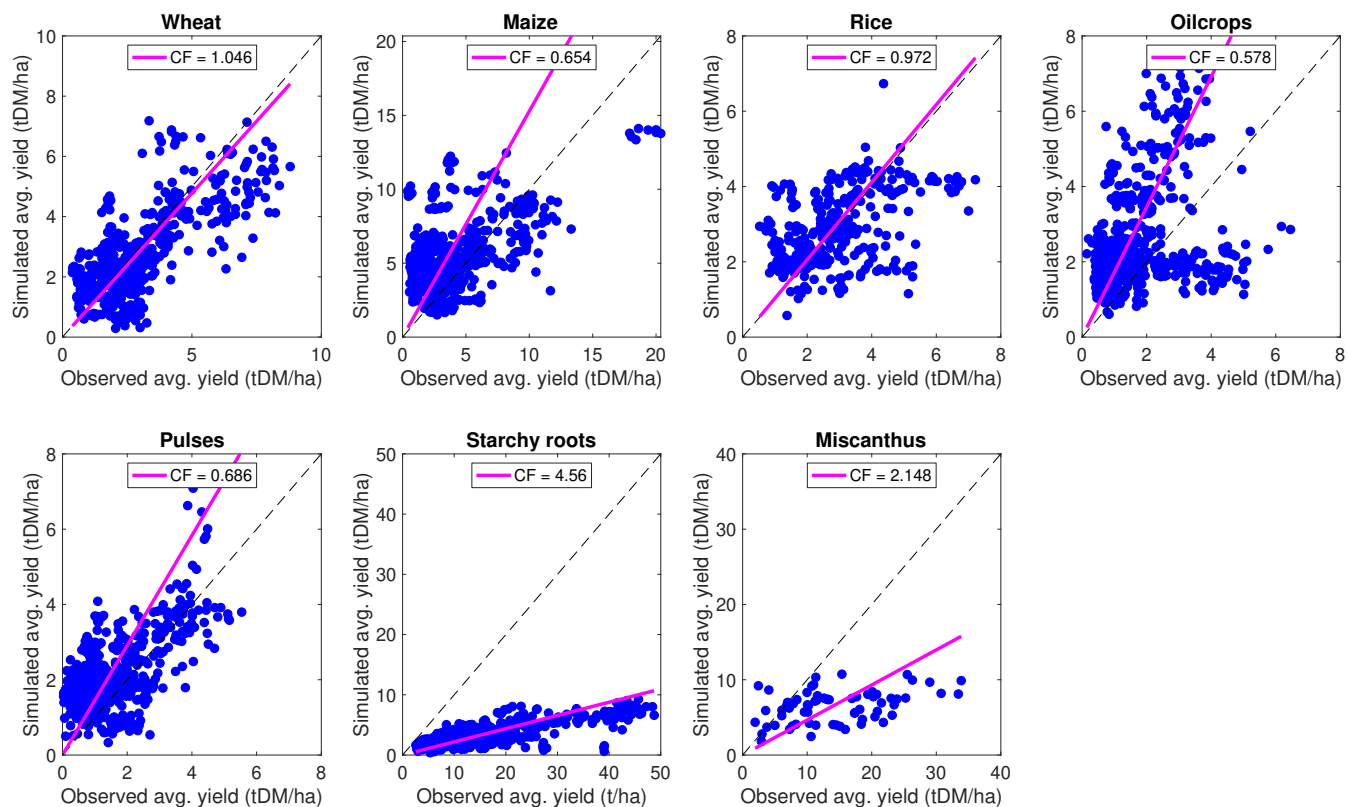

**Figure SM2.** Scatter plots between observed and LPJ-GUESS yield, with regression line used to determine calibration factors. Each point represents one country's yield in a single year. Corresponds to Fig. SI-2 in Alexander et al. (2018).

**Table SM7.** Mapping between different crop types used in this study. The first column gives the crop types used by PLUM, which are also the stand types simulated by LPJ-GUESS. The second column shows which CFTs LPJ-GUESS simulates in those stands, and the calibration factor for adjusting the yield for use in PLUM. Table adapted from Alexander et al. (2018).

| Stand type =<br>PLUM crop | CFT<br>(calibration<br>factor) | MIRCA (crop fraction) or<br>AgMIP (calibration-run<br>fertilizer) crop types                                                      | LUH2 crops<br>(actual-run fertilizer<br>and irrigated fraction)                           | FAO crops (calibration area;<br>from FAOSTAT's "Production:<br>Crops")                                                                                                                                                                                                                                                                      | FAO crops (calibration<br>production tonnage; from<br>FAOSTAT's "Commodity<br>Balance: Crops primary<br>equivalent") |
|---------------------------|--------------------------------|-----------------------------------------------------------------------------------------------------------------------------------|-------------------------------------------------------------------------------------------|---------------------------------------------------------------------------------------------------------------------------------------------------------------------------------------------------------------------------------------------------------------------------------------------------------------------------------------------|----------------------------------------------------------------------------------------------------------------------|
| CerealsC3                 | TeWW or<br>TeSW (1.056)        | Wheat, Barley, Rye                                                                                                                | All: C3ann                                                                                | Wheat, Barley, Rye                                                                                                                                                                                                                                                                                                                          | Wheat and products, Barley<br>and products, Rye and products                                                         |
| CerealsC4                 | TeCo (0.738)                   | Maize, Millet, Sorghum                                                                                                            | All: C4ann                                                                                | Maize, Millet, Sorghum                                                                                                                                                                                                                                                                                                                      | Maize and products, Millet and<br>products, Sorghum and<br>products                                                  |
| Rice                      | TrRi (1.052)                   | Rice                                                                                                                              | C3ann                                                                                     | Rice paddy                                                                                                                                                                                                                                                                                                                                  | Rice (paddy equivalent)                                                                                              |
| Oilcrops                  | TeSW (0.687)                   | Sunflower, Soybeans,<br>Groundnuts/ Peanuts,<br>Rapeseed/Canola, Oilpalm                                                          | Area-weighted average<br>of C3nfx (Soybeans,<br>Groundnuts/Peanuts)<br>and C3ann (others) | Coconuts, Seed cotton,<br>Groundnuts with shell, Karite<br>nuts (sheanuts), Castor oil<br>seed, Tung nuts, Jojoba seed,<br>Safflower seed, Poppy seed,<br>Melonseed, Tallowtree seed,<br>Kapok fruit, Linseed,<br>Hempseed, Oilseeds nes,<br>Olives, Oil palm fruit,<br>Rapeseed, Mustard seed,<br>Sesame seed, Soybeans,<br>Sunflower seed | Oilcrops                                                                                                             |
| Pulses                    | TeSW (0.865)                   | MIRCA: Pulses; AgMIP:<br>Groundnuts, Soybeans                                                                                     | All: C3nfx                                                                                | Pulses total                                                                                                                                                                                                                                                                                                                                | Pulses                                                                                                               |
| Starchy roots             | TeSW (5.443)                   | Potatoes, Sugarbeet, Cassava                                                                                                      | All: C3ann                                                                                | Roots and tubers total                                                                                                                                                                                                                                                                                                                      | Starchy roots                                                                                                        |
| Miscanthus                | TeCo (2.148)                   | n/a (only simulated in<br>PLUM-forced runs)                                                                                       | n/a (only simulated in<br>PLUM-forced runs)                                               | n/a (calibrated against BetyDB<br>data)                                                                                                                                                                                                                                                                                                     | n/a (calibrated against BetyDB<br>data)                                                                              |
| ExtraCrop                 | n/a                            | MIRCA: Sugarcane, citrus,<br>date palm, grapes/vine, cotton,<br>cocoa, coffee, other annuals,<br>other perennials, fodder grasses | n/a (no fertilizer or<br>irrigation)                                                      | n/a (not calibrated)                                                                                                                                                                                                                                                                                                                        | n/a (not calibrated)                                                                                                 |

## References

- Alexander, P., Rabin, S. S., Anthoni, P., Henry, R., Pugh, T. A. M., Rounsevell, M. D. A., and Arneth, A.: Adaptation of global land use and management intensity to changes in climate and atmospheric carbon dioxide, *Global Change Biology*, 24, 2791–2809, <https://doi.org/10.1111/gcb.14110>, <http://doi.wiley.com/10.1111/gcb.14110>, 2018.
- FAOSTAT: Commodity Balances/Crops Primary Equivalent (2018-09-24), Food and Agriculture Organization of the United Nations, 2018a.
- FAOSTAT: Inputs/Land Use (2018-09-24), Food and Agriculture Organization of the United Nations, <http://www.fao.org/faostat/en/#data/RL>, 2018b.
- FAOSTAT: Production/Crops (2018-09-24), Food and Agriculture Organization of the United Nations, 2018c.
- Zhang, B., Tian, H., Lu, C., Dangal, S. R. S., Yang, J., and Pan, S.: Manure nitrogen production and application in cropland and rangeland during 1860–2014: A 5-minute gridded global data set for Earth system modeling, *Earth System Science Data Discussions*, pp. 1–35, <https://doi.org/10.5194/essd-2017-11>, <http://www.earth-syst-sci-data-discuss.net/essd-2017-11/>, 2017.
