# Supplementary material for: Impacts of future agricultural change on ecosystem service indicators
Source: Copernicus journal article supplement (doi:10.5194/esd-2019-44), 2019-08-15
Supplement: Supplementary file 2 [file LPJGP_1way_impacts_v5.3.1_supp_results.pdf › LPJGP_1way_impacts_v5.3.1_supp_results.pdf]

# Impacts of future agricultural change on ecosystem service indicators

## Supplementary Results

5

[This page intentionally left blank.]

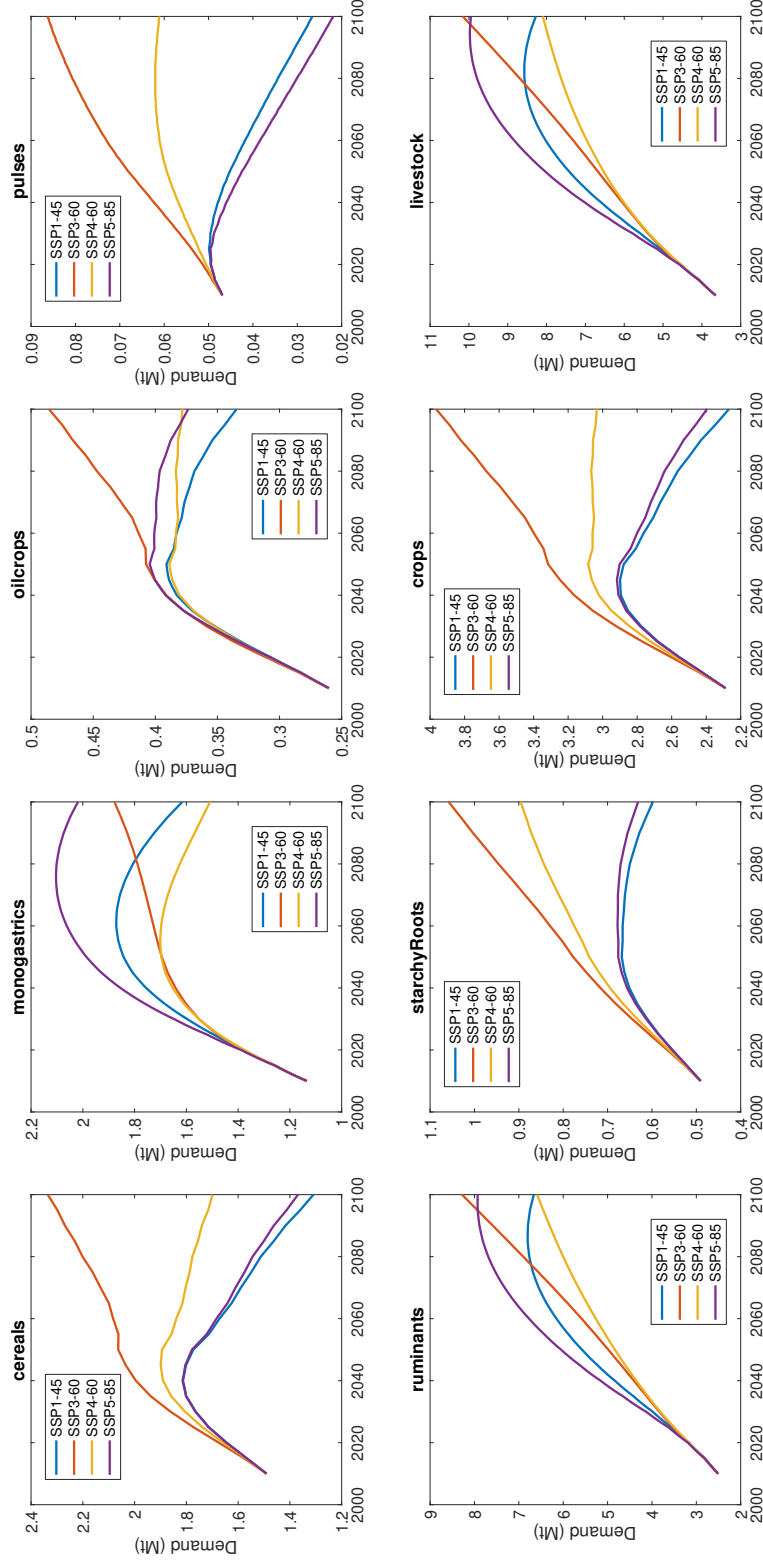

**Figure SR1.** Demand calculated by PLUM for each commodity in each scenario.

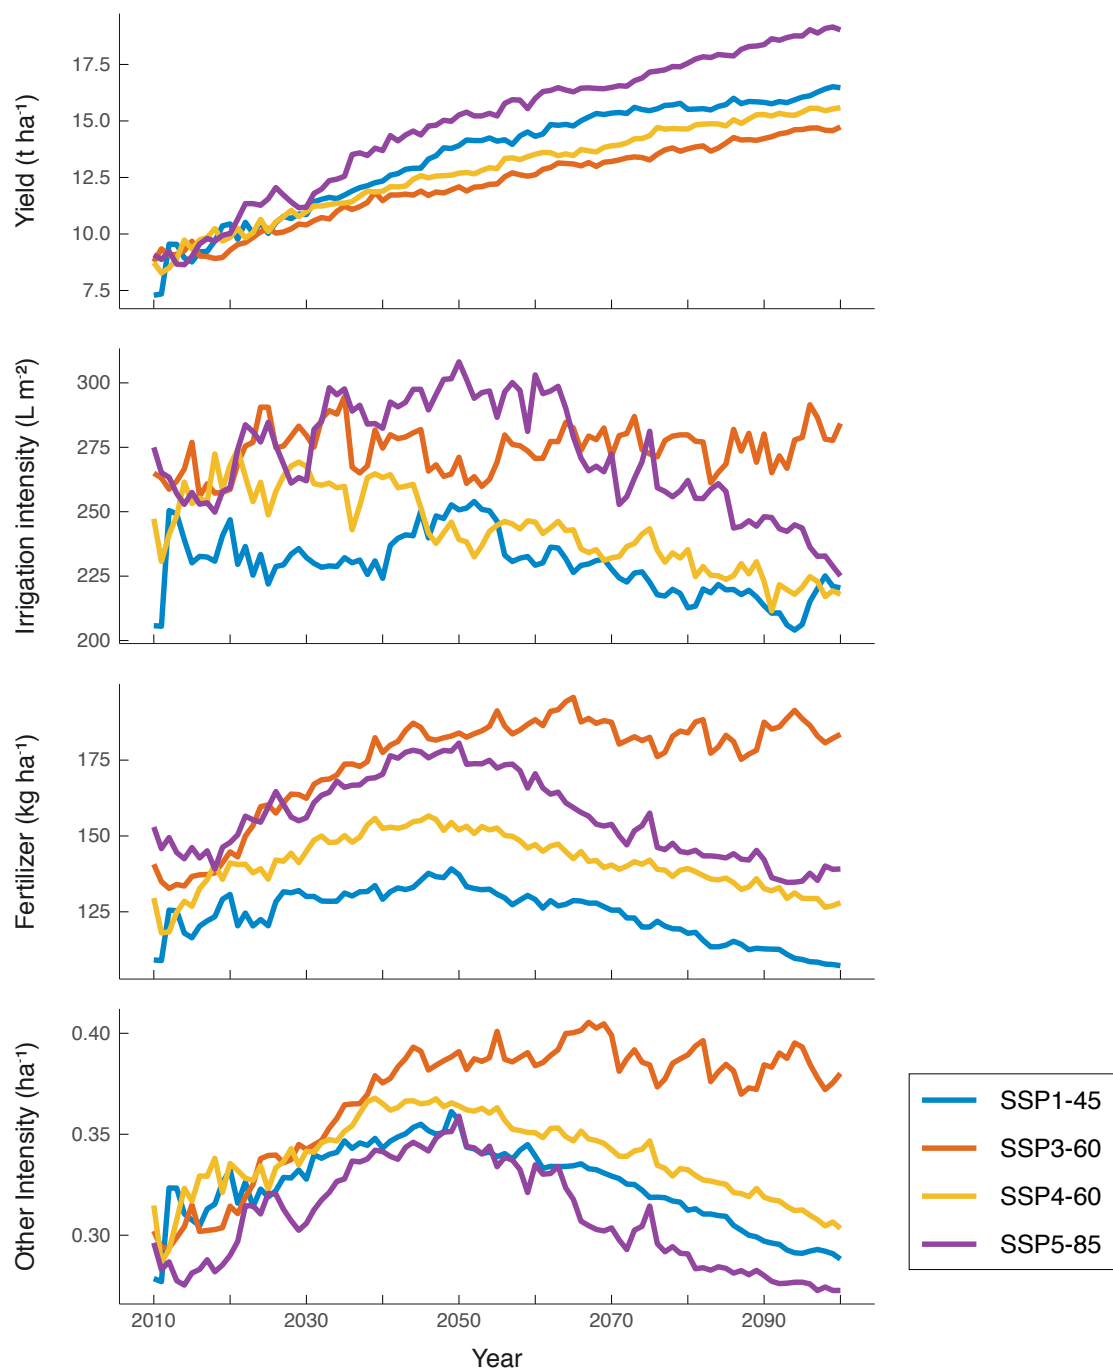

**Figure SR2.** Global management inputs and expected yields calculated by PLUM for each scenario. Averages per area of cropland.

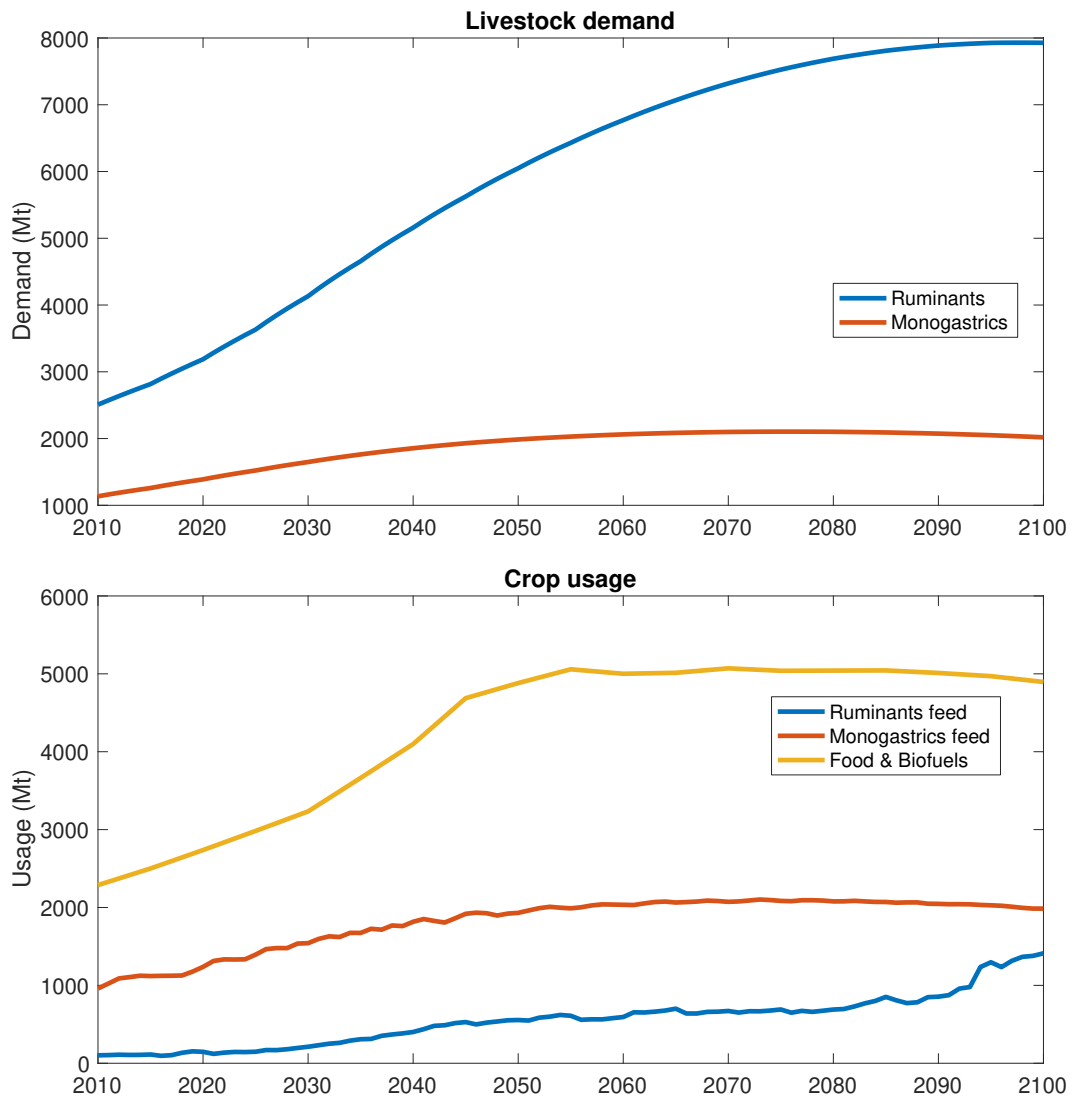

**Figure SR3.** SSP5-85 (**top**) livestock demand and (**bottom**) crop usage.

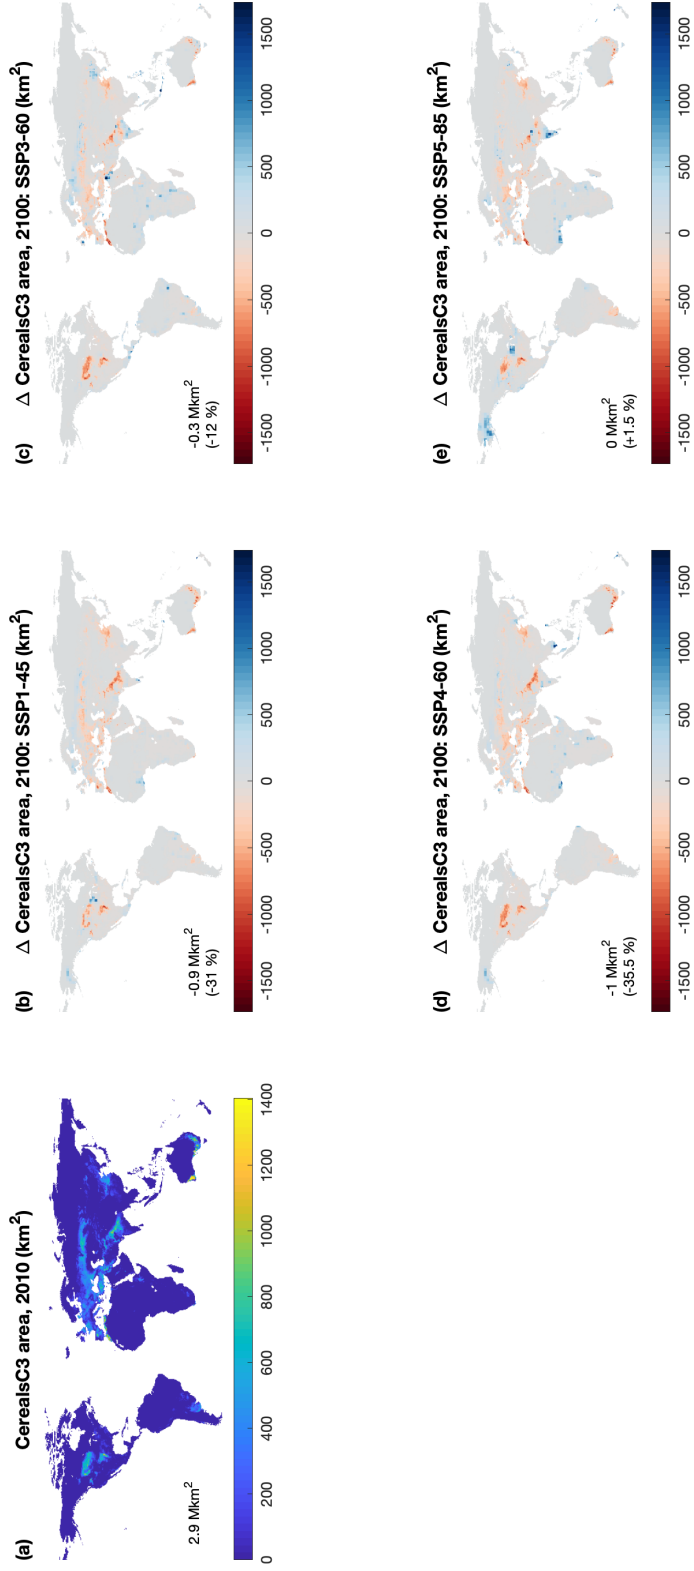

**Figure SR4.** (a) Area of cropland planted with CerealsC3 in 2010 from LUH2. (b–e) Difference between (a) and area in 2100 from PLUM for (b) SSP3-60, (c) SSP3-60, (d) SSP1-45, (e) SSP4-60.

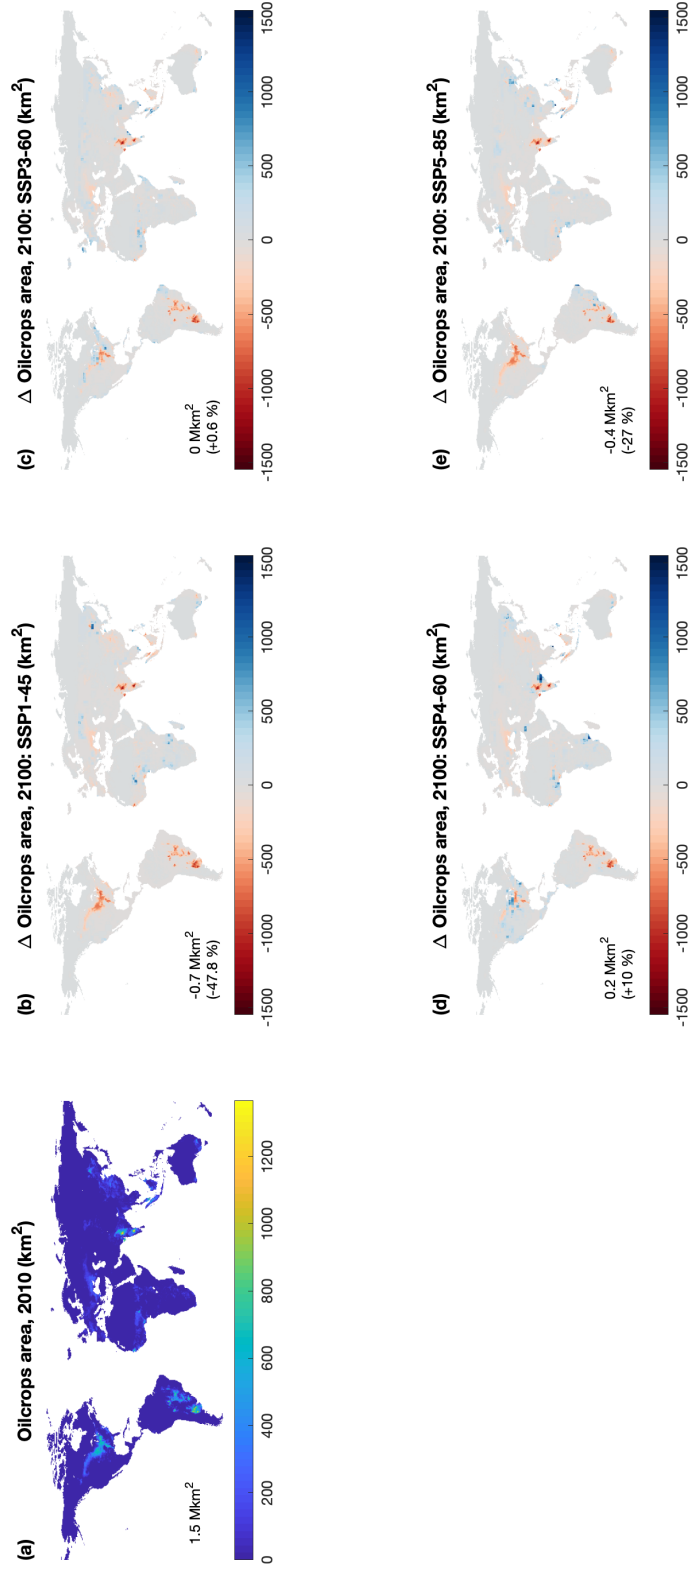

**Figure SR5.** As Figure SR4, but for Oilcrops.

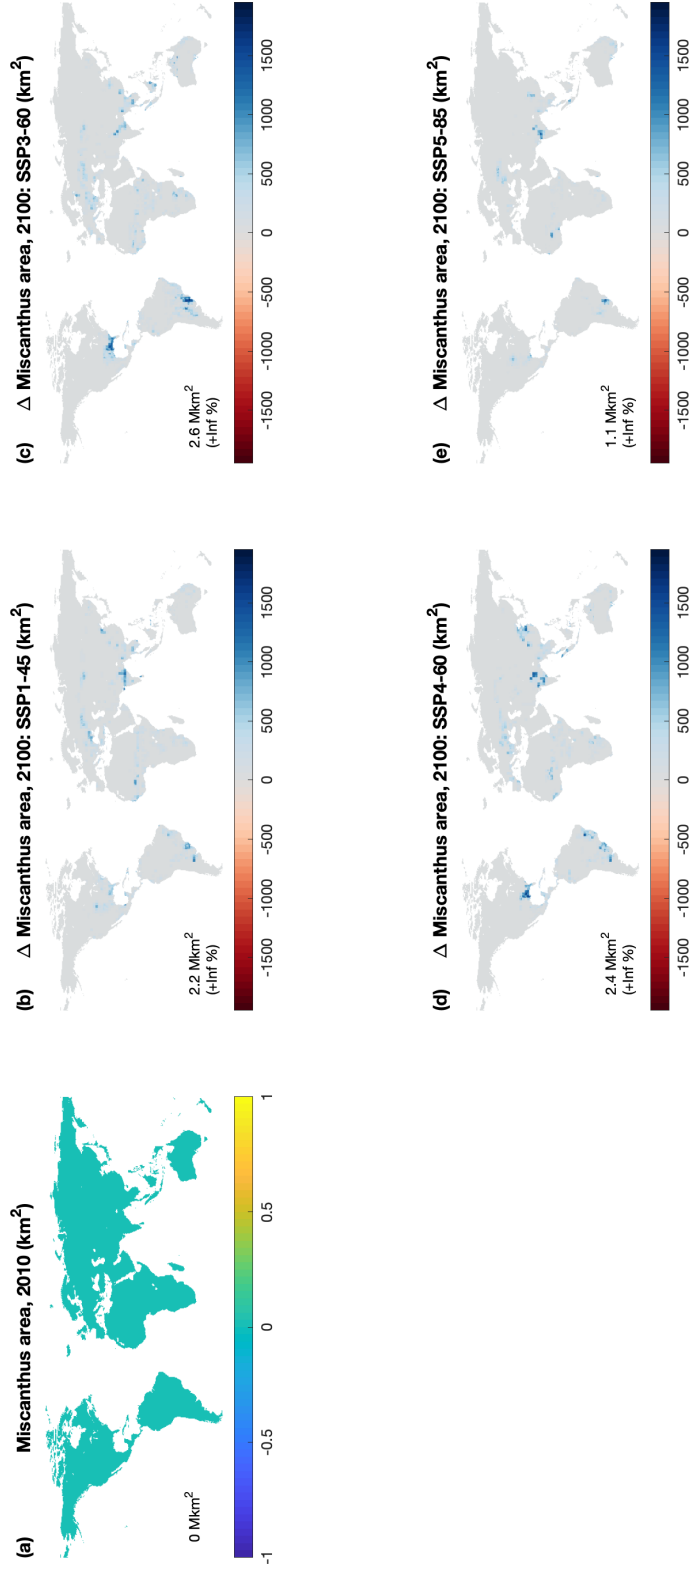

**Figure SR6.** As Figure SR4, but for *Miscanthus*.

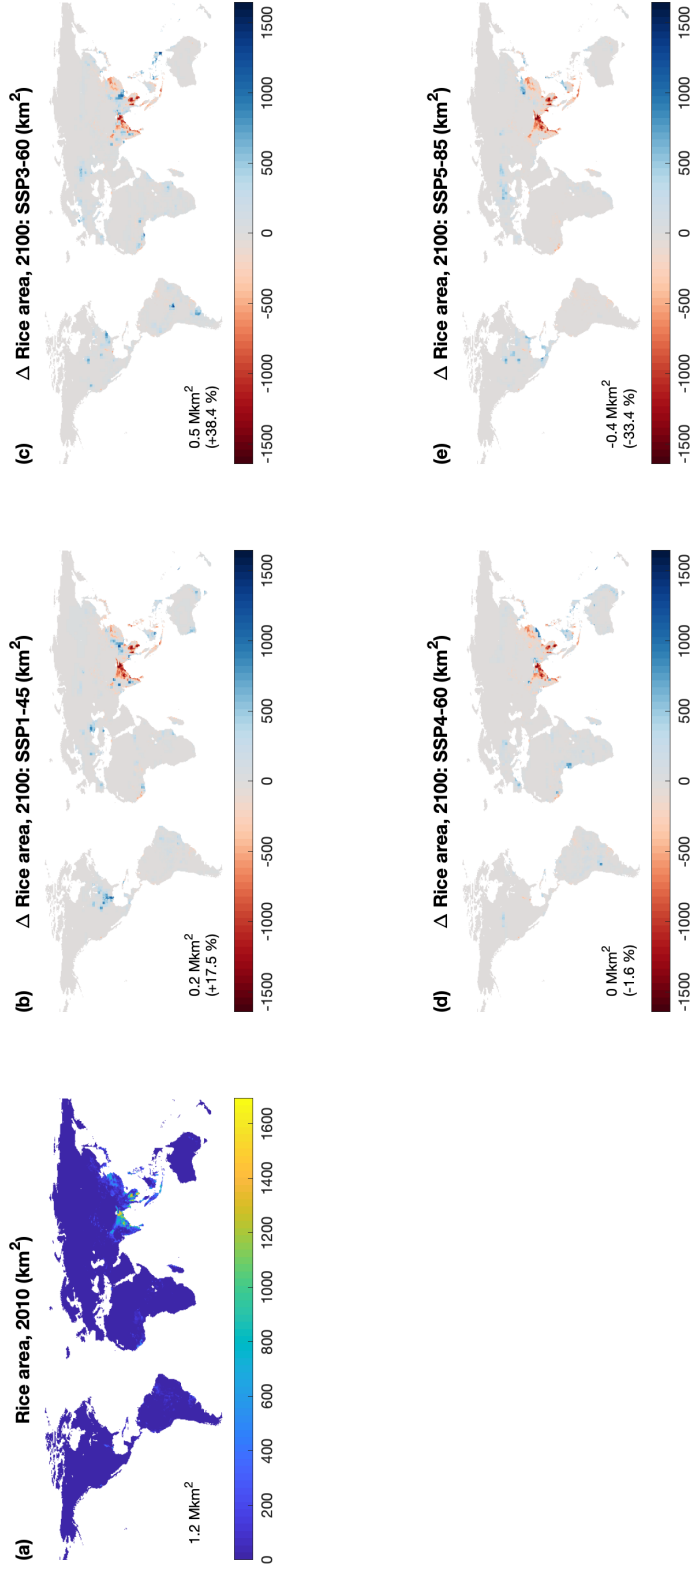

**Figure SR7.** As Figure SR4, but for Rice.



# USA + Canada

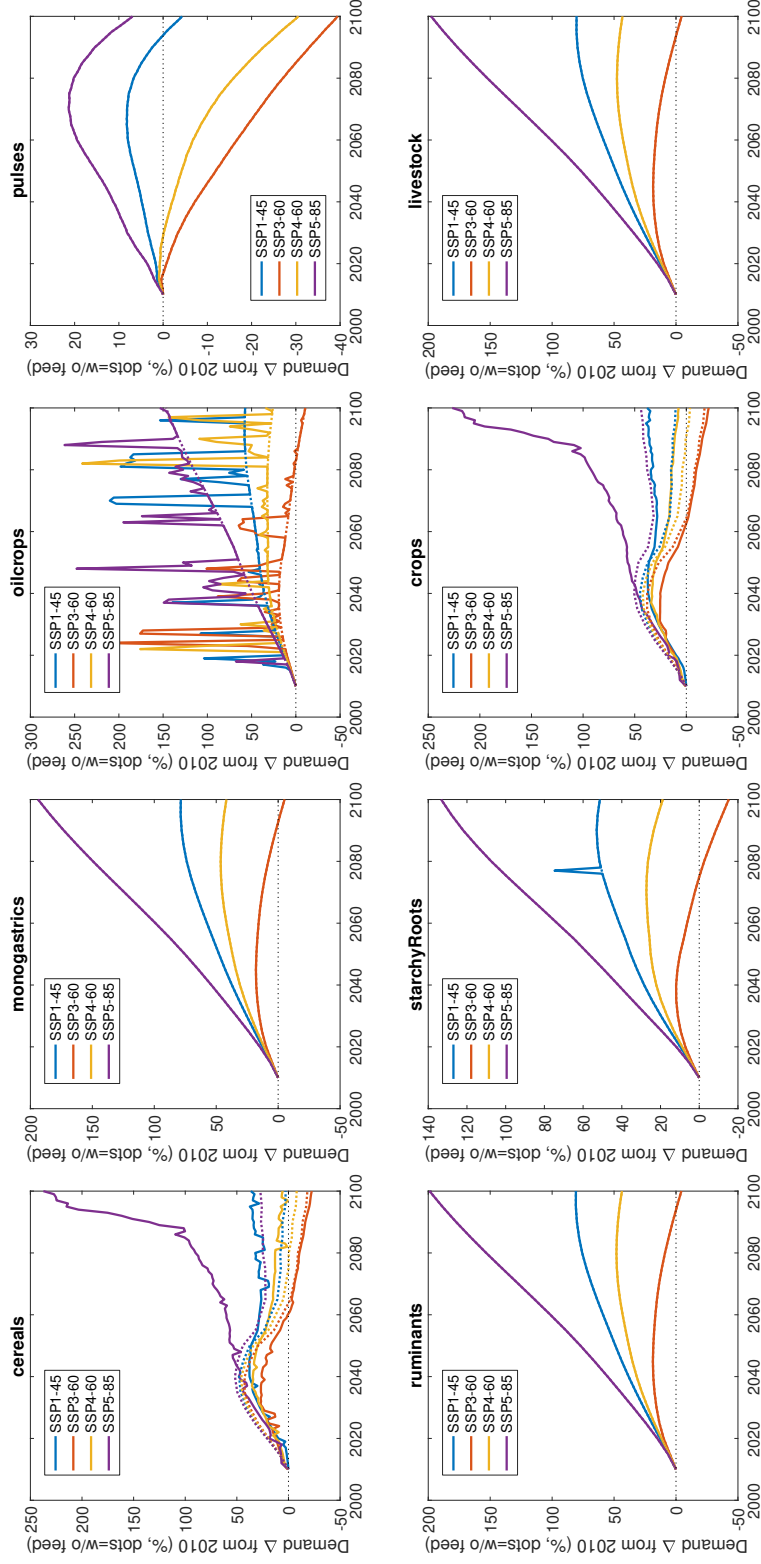

**Figure SR8.** Percentage change in demand in North America (United States and Canada) for commodities and commodity groups in each scenario. Solid lines include all uses; dotted lines exclude feed.

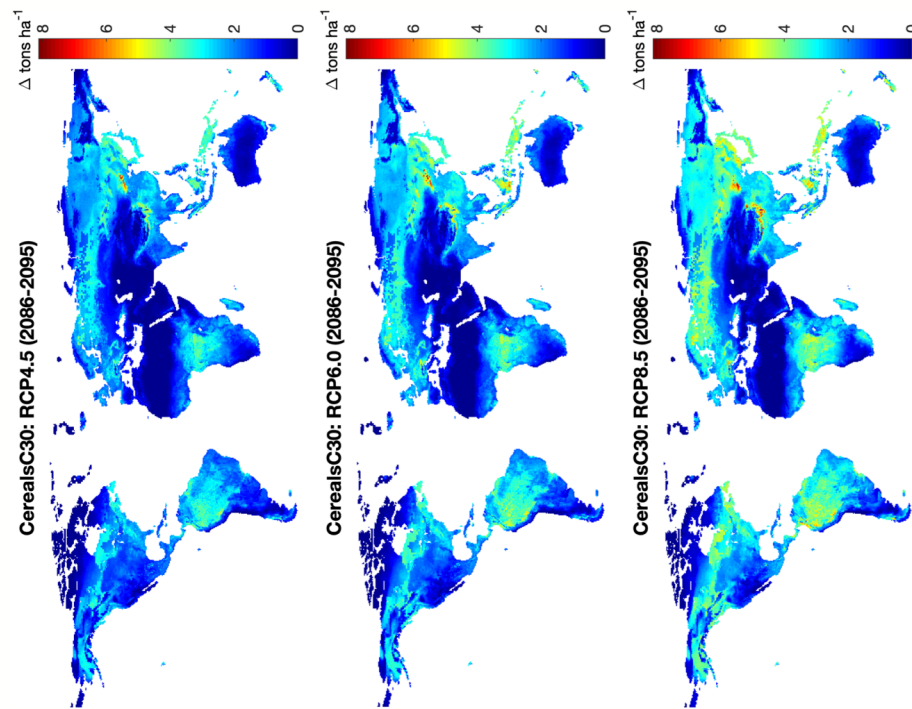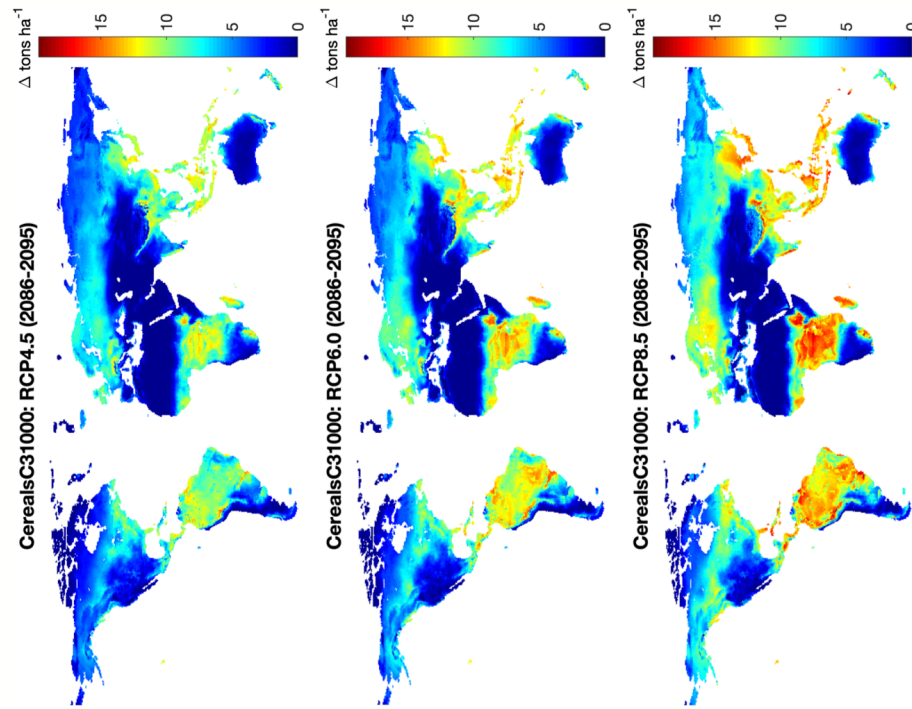

**Figure SR9.** LPJ-GUESS simulated mean yield in 2086–2095 (not including PLUM calibration factors) for rainfed CerealsC3 with (columns) 0 and 1000 kgN ha<sup>-1</sup> (rows) in each climate scenario, from yield-generating potential runs. Note different color scales between columns.

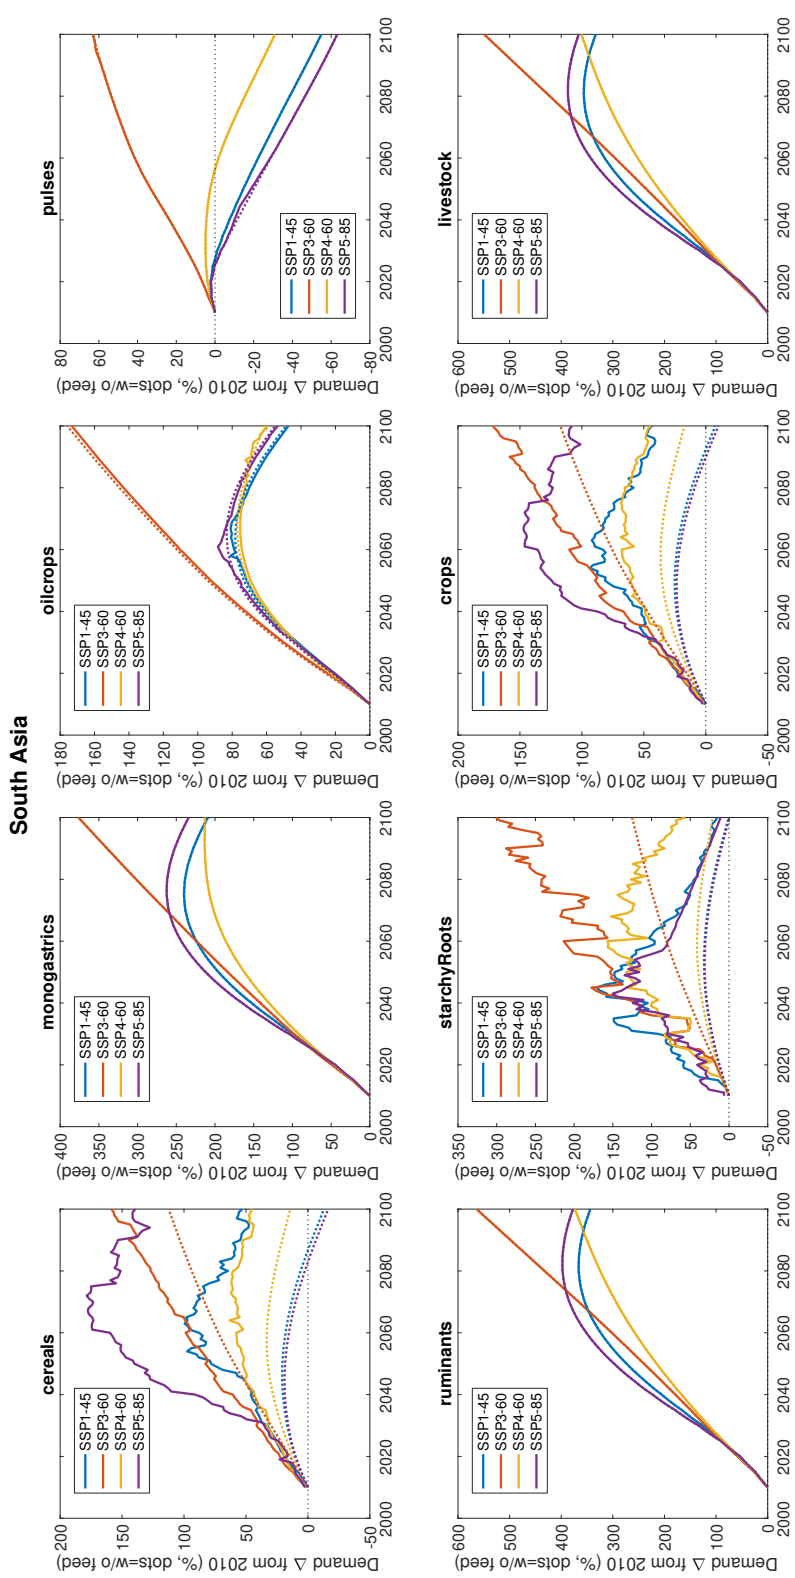

**Figure SR10.** As Fig. SR8 but for South Asia (India, Sri Lanka, Pakistan, Afghanistan, Bhutan, and Nepal).

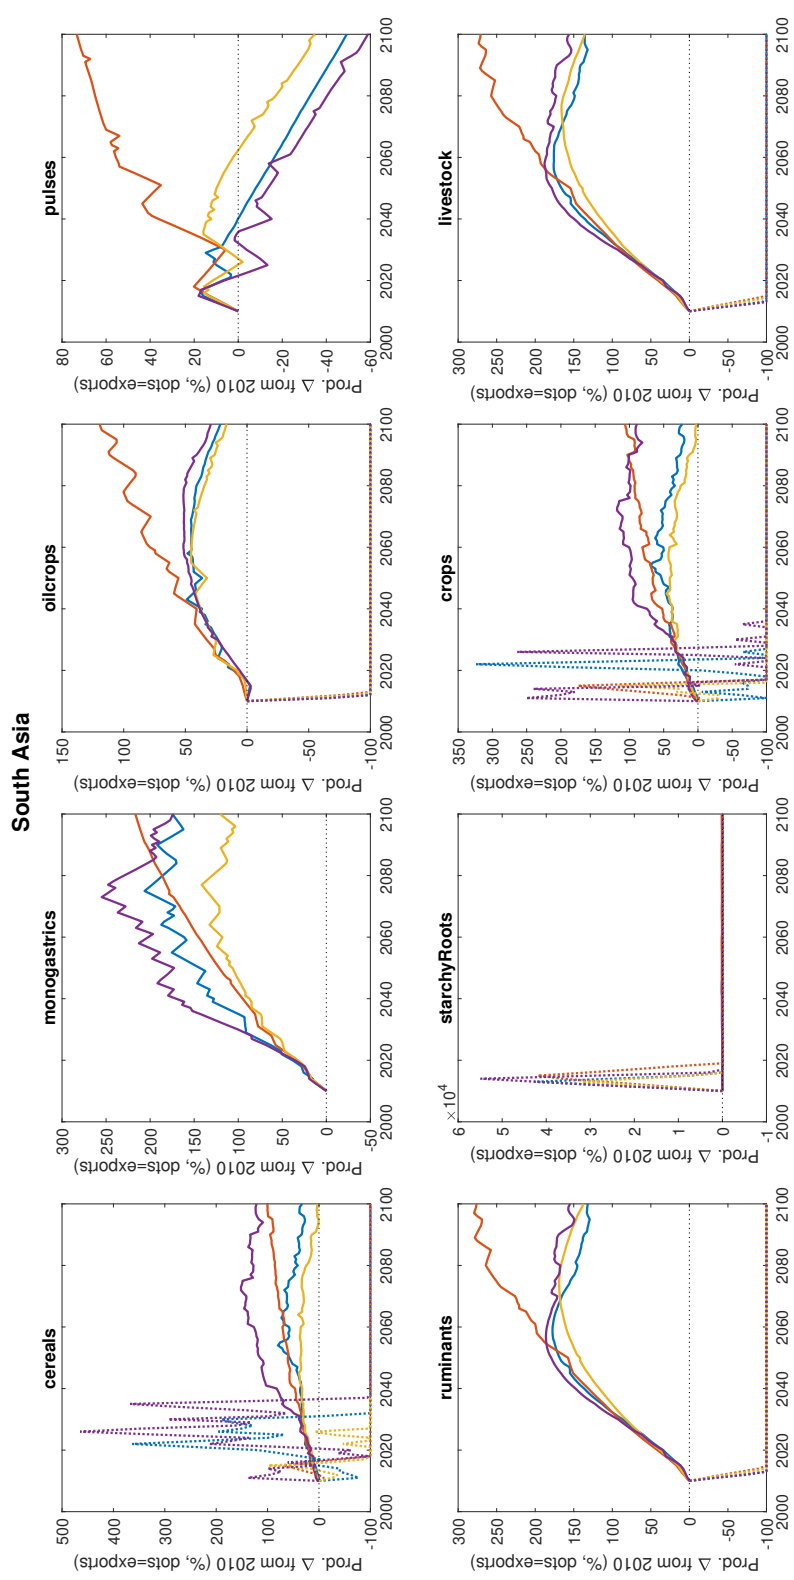

**Figure SR11.** Percentage change in PLUM-expected production in South Asia (India, Sri Lanka, Pakistan, Afghanistan, Bhutan, and Nepal) for commodities and commodity groups in each scenario. Solid lines include production for domestic use and exports; dotted lines include only exports.

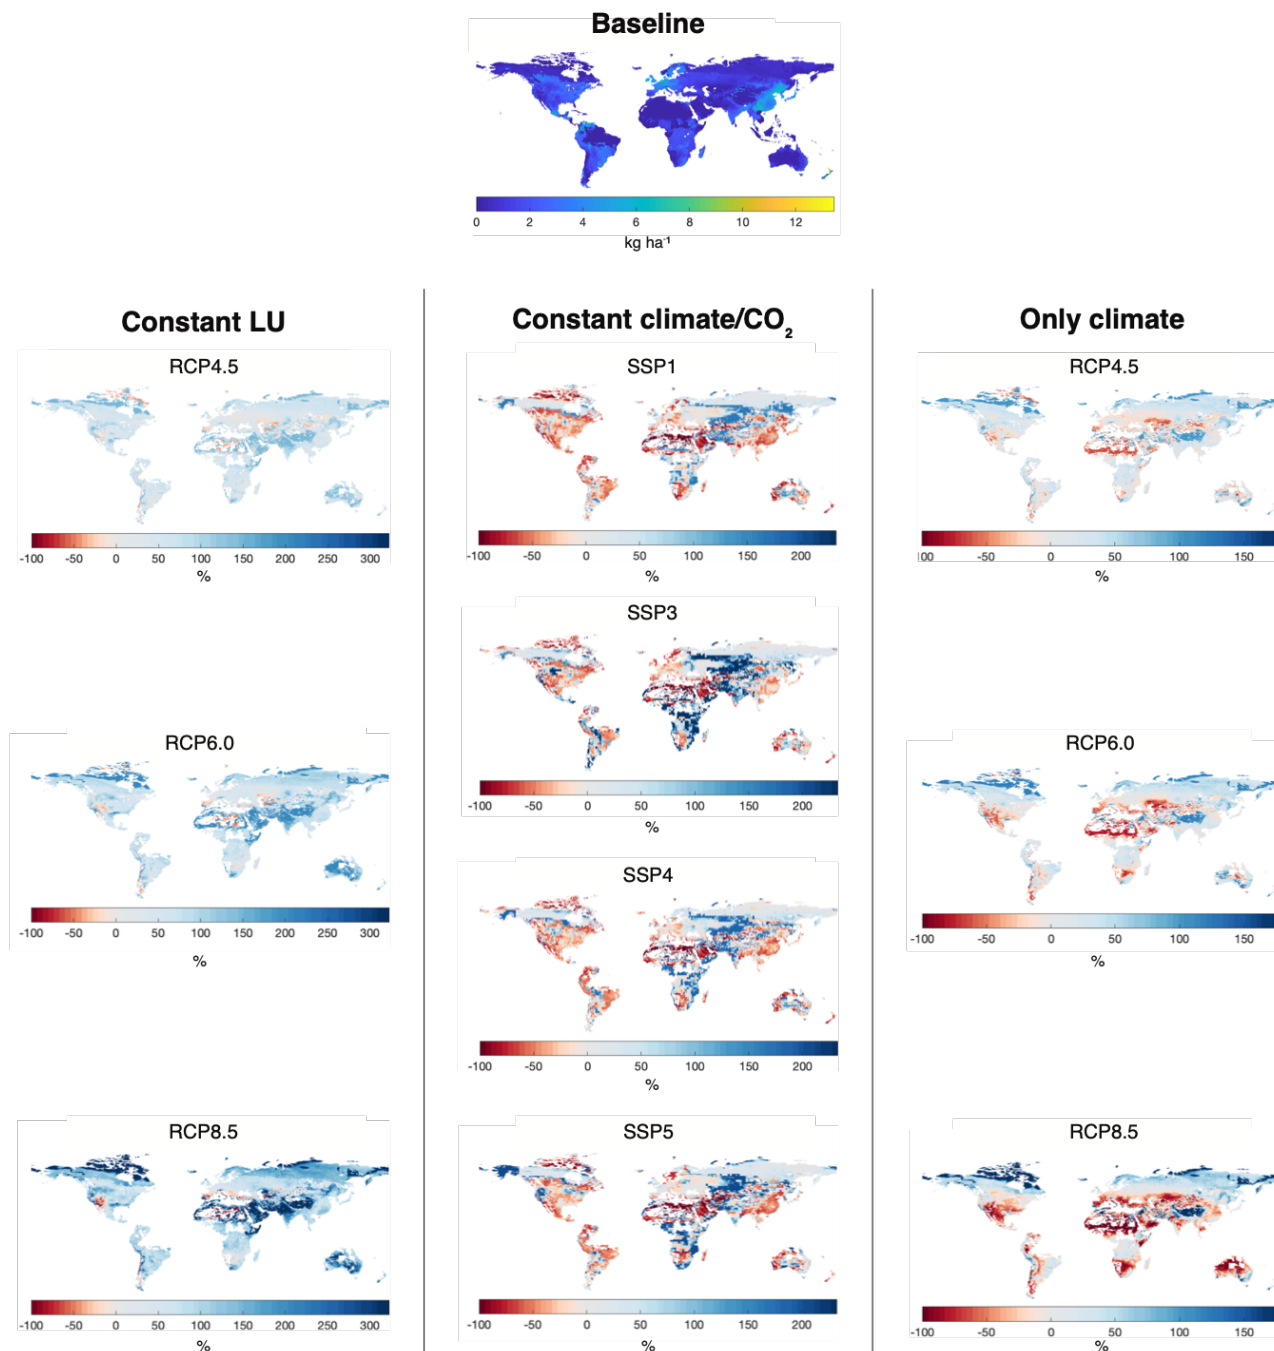

**Figure SR12.** Percent change in mean yield (kg ha<sup>-1</sup> yr<sup>-1</sup>) of CerealsC3 from 2001–2010 ("Baseline") to 2091–2100 in Constant-LU (left), Constant Climate+CO<sub>2</sub> (center), and Only Climate experiments for each scenario. Note that color scales differ between columns.

### Sub-Saharan Africa

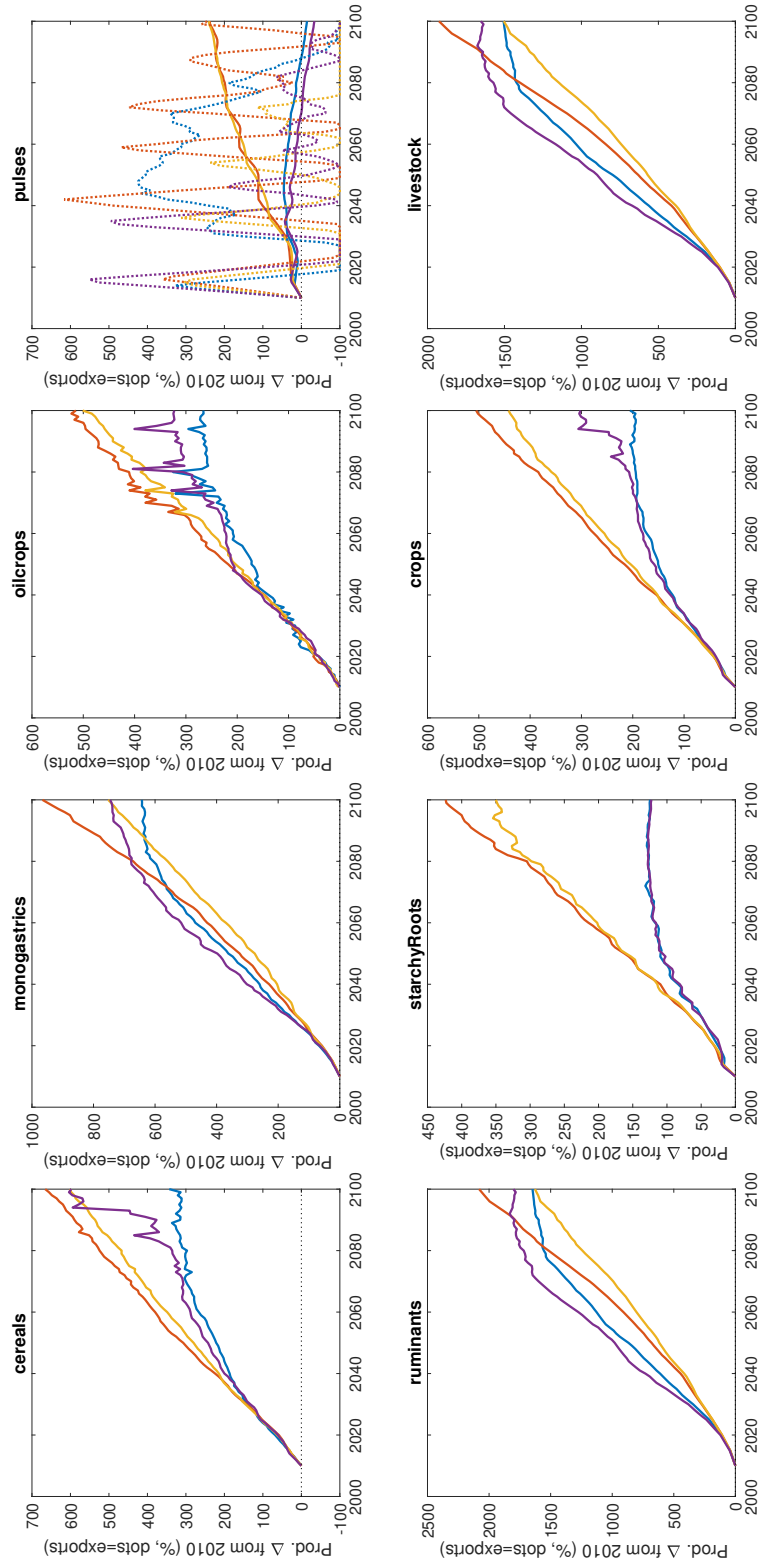

**Figure SR13.** As Fig. SR11 but for Sub-Saharan Africa (Madagascar plus all continental African countries except Algeria, Djibouti, Egypt, Morocco, Libya, and Tunisia).

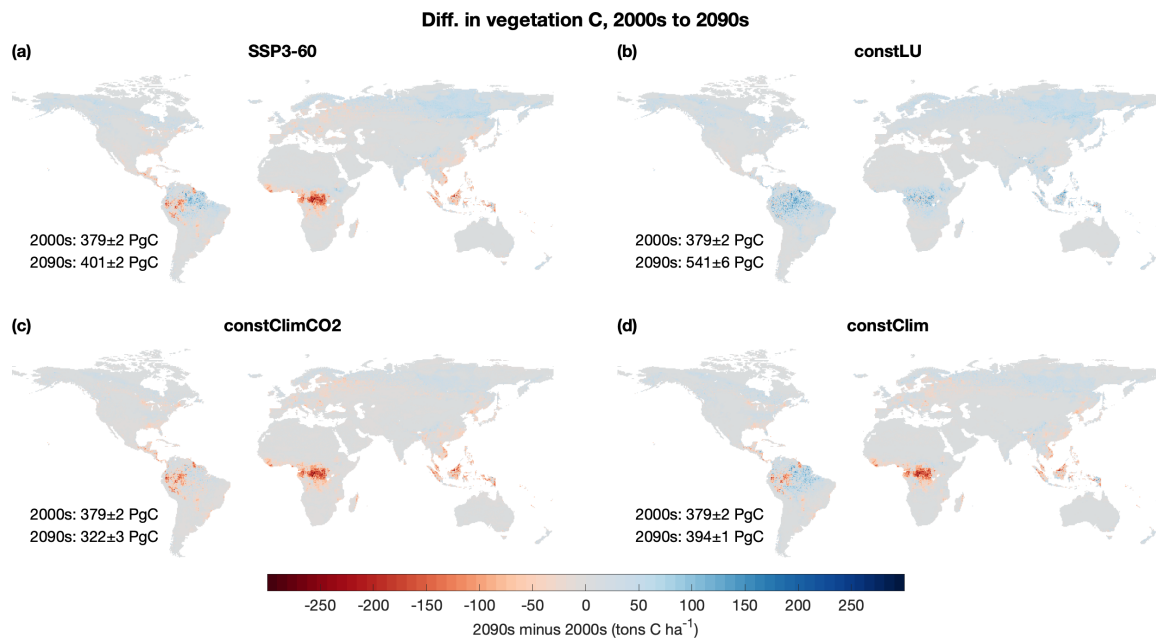

**Figure SR14.** Maps showing difference in mean vegetation carbon between 2001–2010 (“2000s”) and 2091–2100 (“2090s”) for **(a)** SSP3-60, **(b–e)** related experiments with land use, climate, and/or CO<sub>2</sub> held constant. Overlaid text provides decadal means and standard deviations.

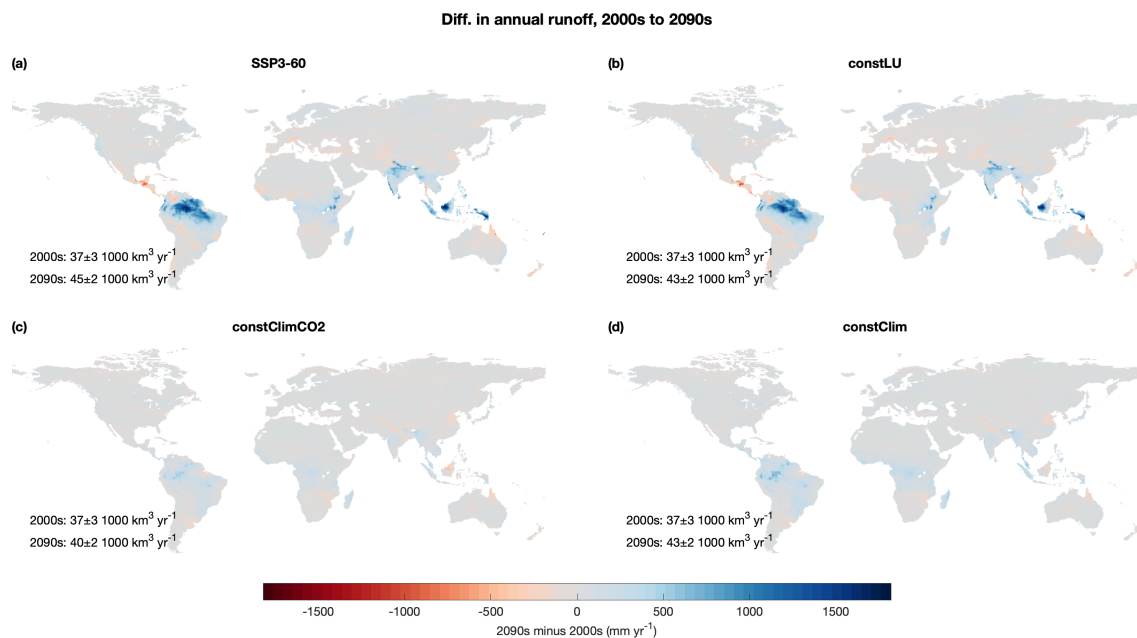

**Figure SR15.** Maps showing difference in mean annual runoff between 2001–2010 (“2000s”) and 2091–2100 (“2090s”) for **(a)** SSP3-60, **(b–e)** related experiments with land use, climate, and/or CO<sub>2</sub> held constant. Overlaid text provides decadal means and standard deviations.

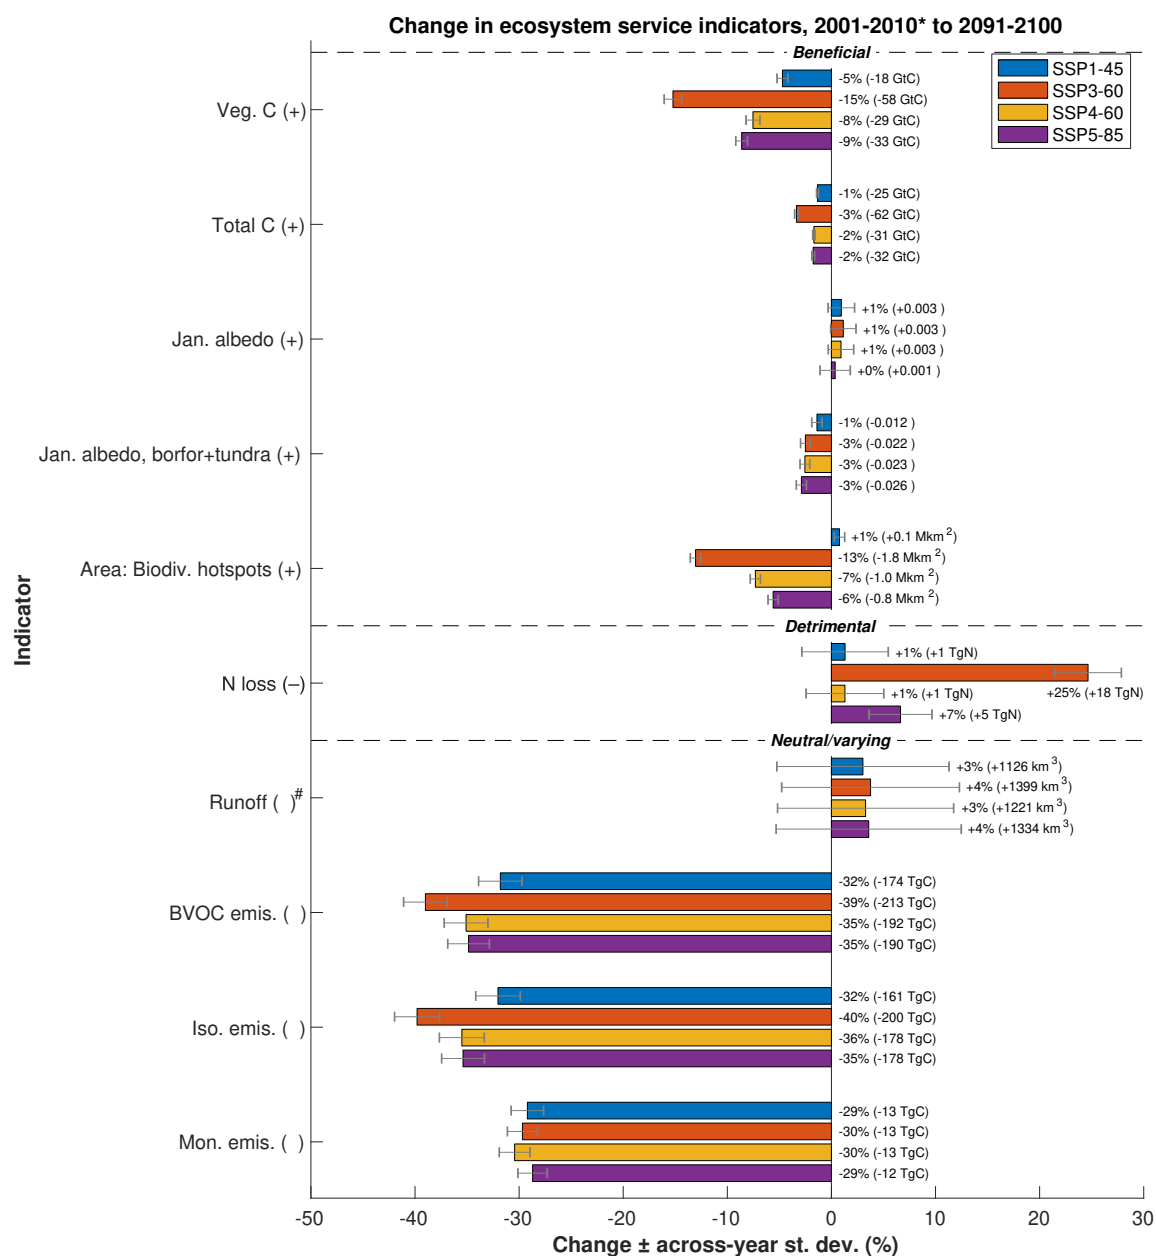

**Figure SR16.** As Figure 3, but for the Constant Climate+CO2 experiment.



**(a) Diff. in isoprene emissions, 2001-2010 to 2091-2100 (SSP1-45)**

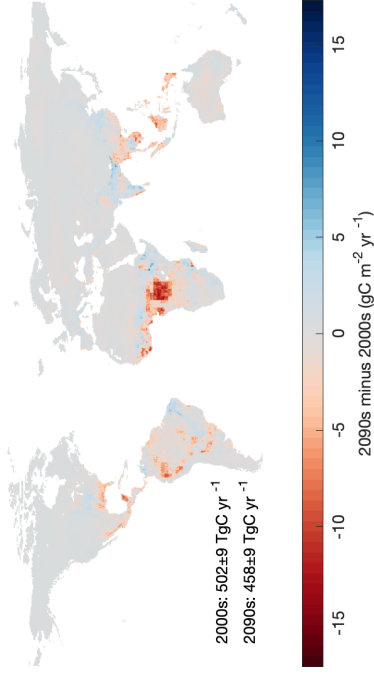

**(c) Diff. in isoprene emissions, 2001-2010 to 2091-2100 (SSP4-60)**

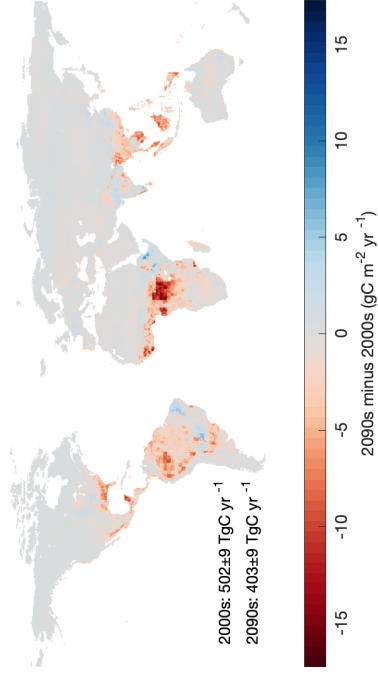

**(b) Diff. in isoprene emissions, 2001-2010 to 2091-2100 (SSP3-60)**

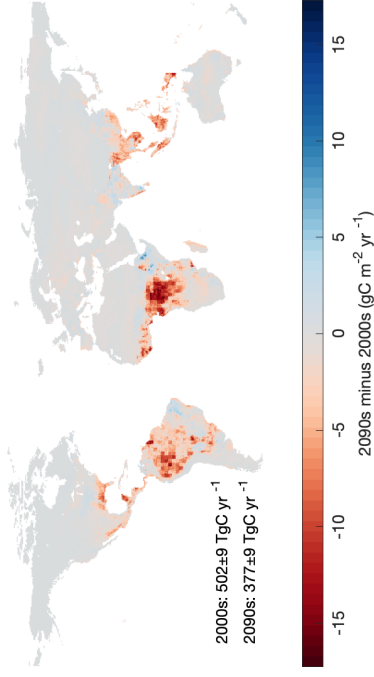

**(d) Diff. in isoprene emissions, 2001-2010 to 2091-2100 (SSP5-85)**

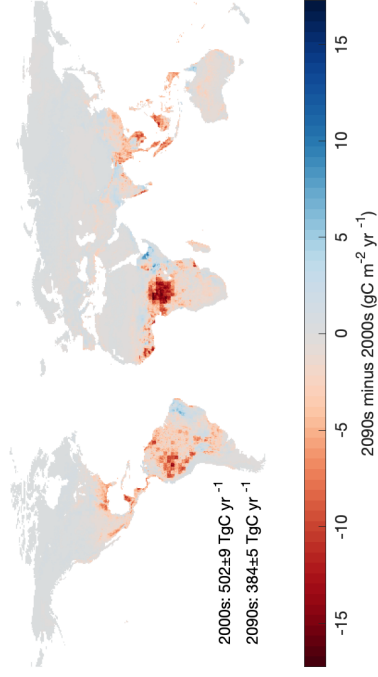

**Figure SR17.** Difference in isoprene emissions (gC m<sup>-2</sup> yr<sup>-1</sup> between 2001–2010 and 2091–2100 in each scenario.

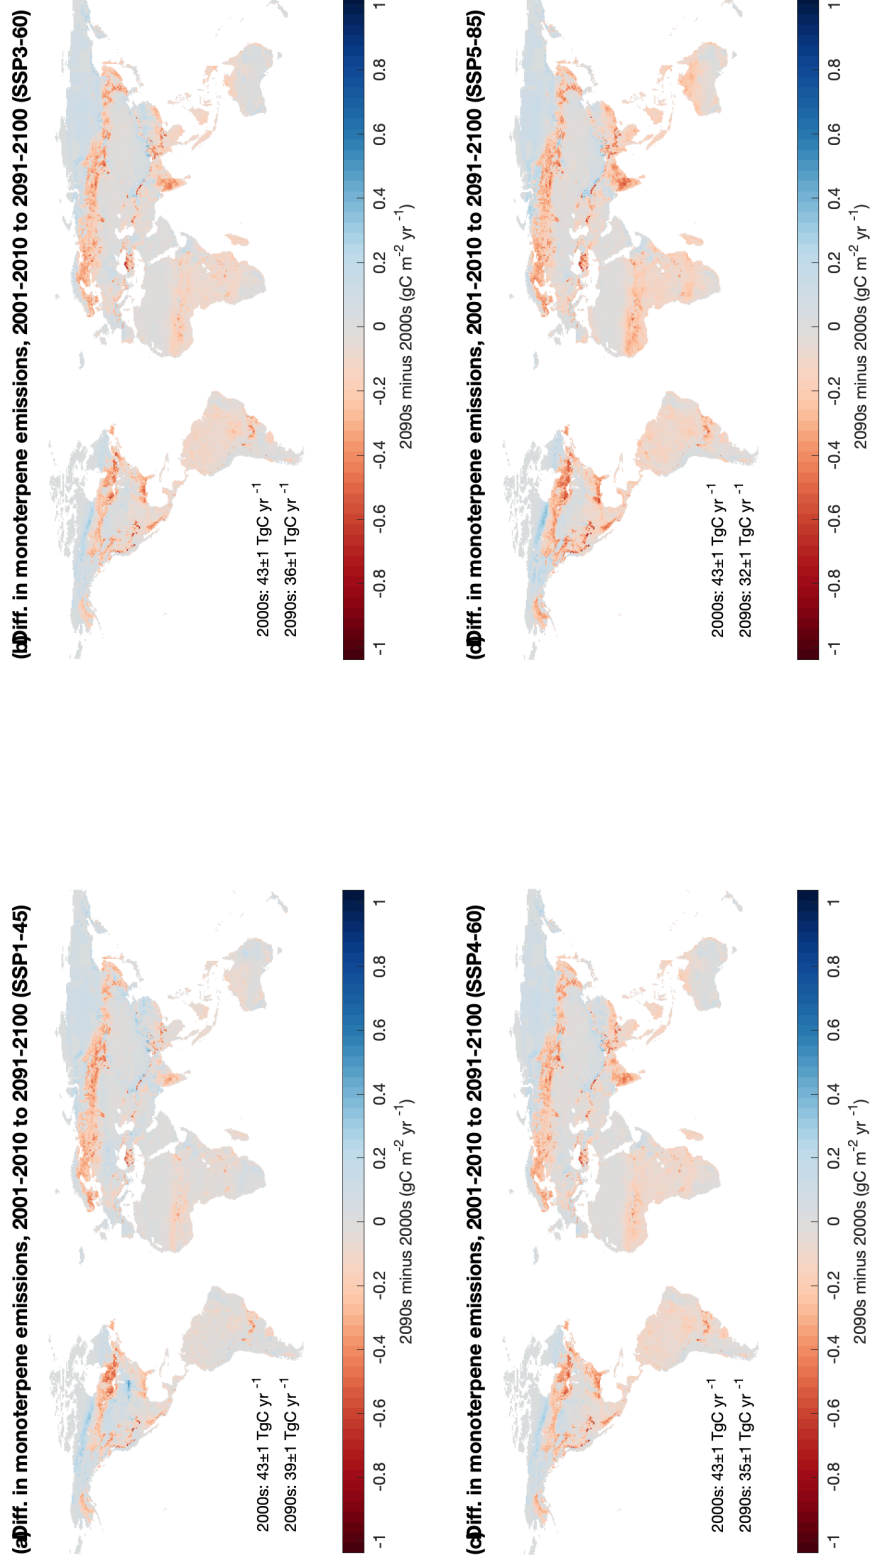

**Figure SR18.** Difference in monoterpene emissions ( $\text{gC m}^{-2} \text{ yr}^{-1}$ ) between 2001–2010 and 2091–2100 in each scenario.

**References**
